# Supplementary material
Source: PubMed Central journal article supplement (PMC5769589)
Supplement: joces-130-203687-s1.pdf [file joces-130-203687-s1.pdf]

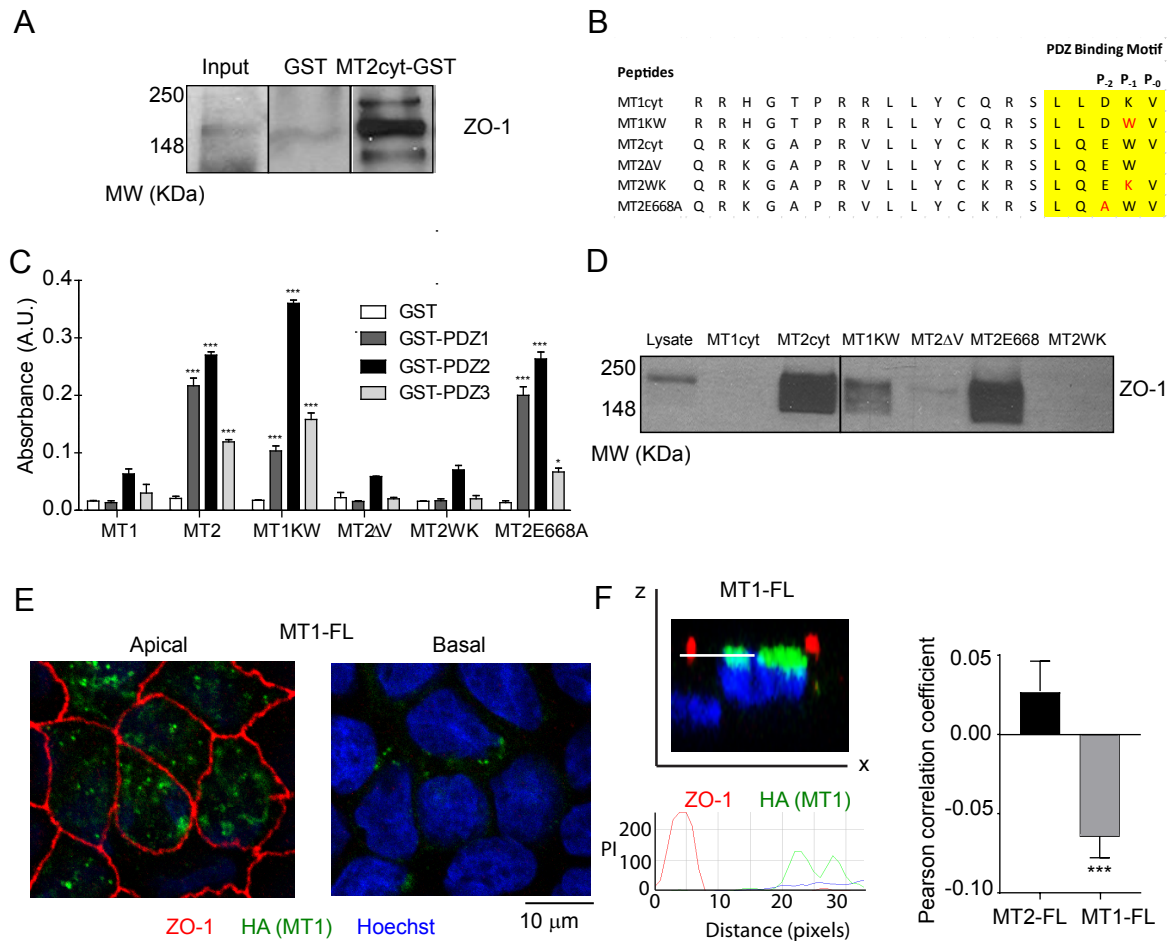

**Figure S1. MT2-MMP associates with ZO-1.** **A**, Pull-down, mass spectrometry, and precipitation assays with GST fusion protein are shown for MT2-MMP and ZO-1 interaction in HUVECs. **B**, Several MT2-MMP and MT1-MMP mutated peptides were shown. **C**, ELISA assay for analysis of interaction of the mutated peptides from **B**, with ZO-1 GST-PDZ domain peptides. **D**, Pull-down assay for interaction of the mutated peptides with ZO-1 is shown. Cytosolic tail (cyt), tryptophan (W), C-term valine (V), glutamic acid, Alanine (A), lysine (K). MW: molecular weight. **E**, Representative maximal projections are shown from apical and basal stacks of confocal sections from polarized MT1-MMP MDCK transfectants (MT1-FL) stained for HA (MT1-MMP, green), ZO-1 (red) and nuclei (Hoechst, blue). **F**, Orthogonal xz view from images in **E** (top) and peak intensity profile (bottom) from the line marked in the xz view (white) are shown to the left. Graph to the right shows the Pearson correlation coefficient of MT1-FL and ZO-1 compared to MT2-FL. n=20 cells in two images. \*\*\* p<0,001.

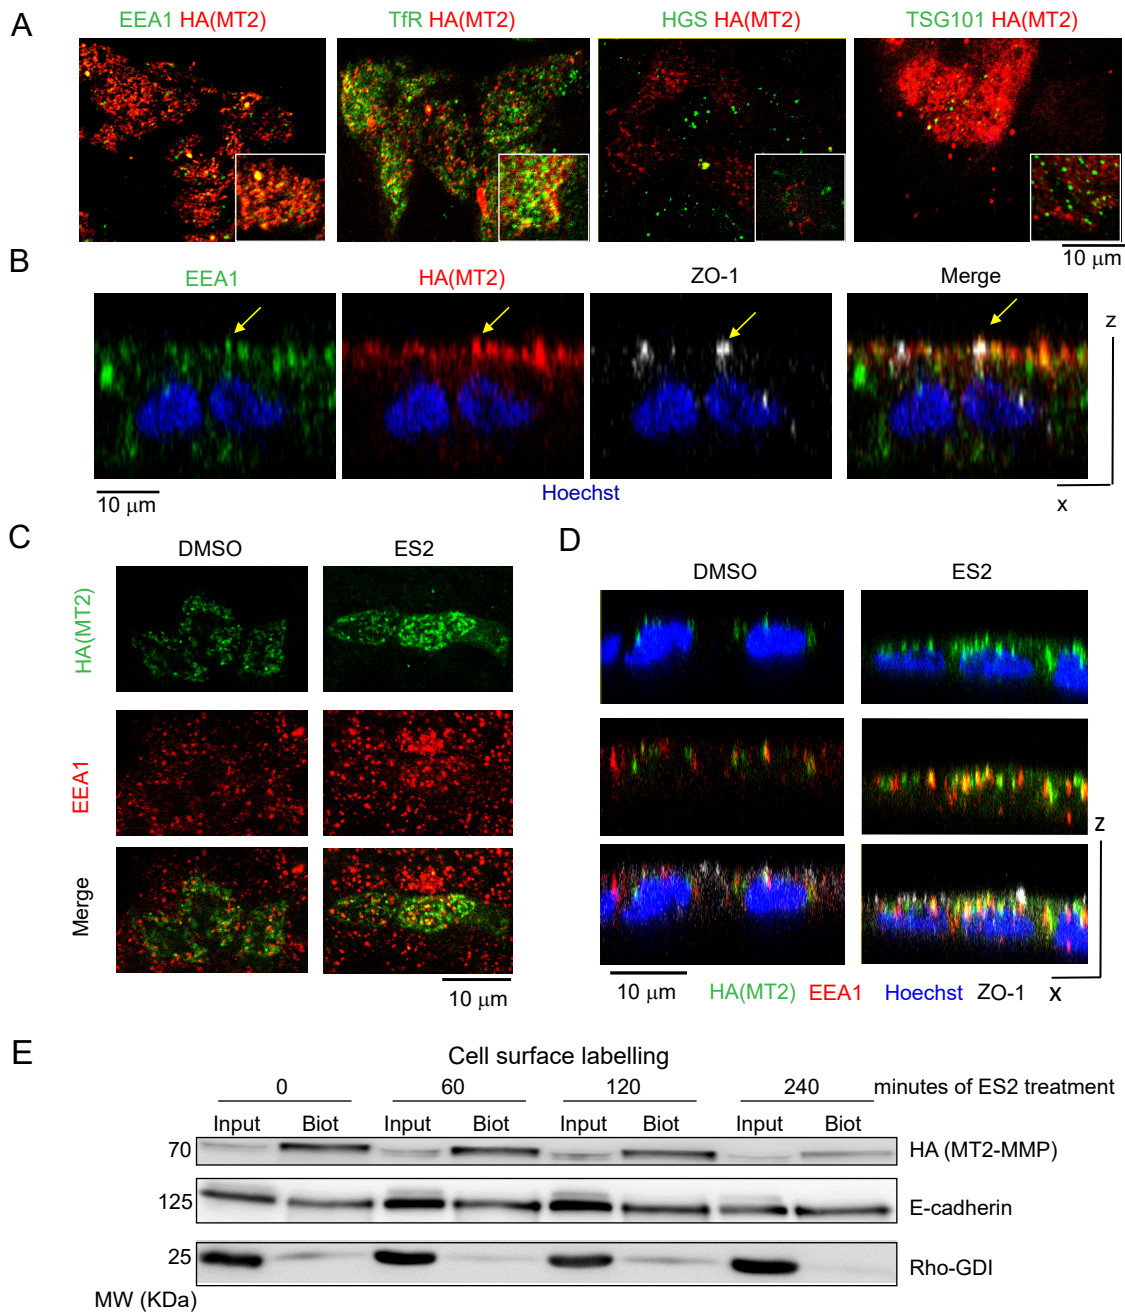

**Figure S2. MT2-MMP localizes in early/recycling endosomes.** **A**, Representative apical confocal sections from MT2-MMP MDCK transfectants stained for HA (MT2-MMP, red) and EEA1, TfR, HGS or TSG101 (green). A higher magnification is shown in the insets. **B**, Orthogonal views from MT2-MMP MDCK transfectants stained for HA (MT2-MMP, red) EEA1 (green), ZO-1 (white), and nuclei (Hoechst, blue). **C**, Representative apical confocal sections from MT2-MMP MDCK transfectants stained for HA (MT2-MMP, green) and EEA1 (red) left untreated (left) or treated with endosidin2 (ES2; 40  $\mu$ M 4 hours). **D**, Orthogonal views of MT2-MMP MDCK cells treated and stained as in C and for ZO-1 (white) and nuclei (Hoechst, blue). **E**, Western blot from biotin-labeled lysates from MT2-MMP MDCKs treated with ES2 for different time points developed for HA (MT2-MMP), E-cadherin and Rho-GDI. MW: molecular weight.

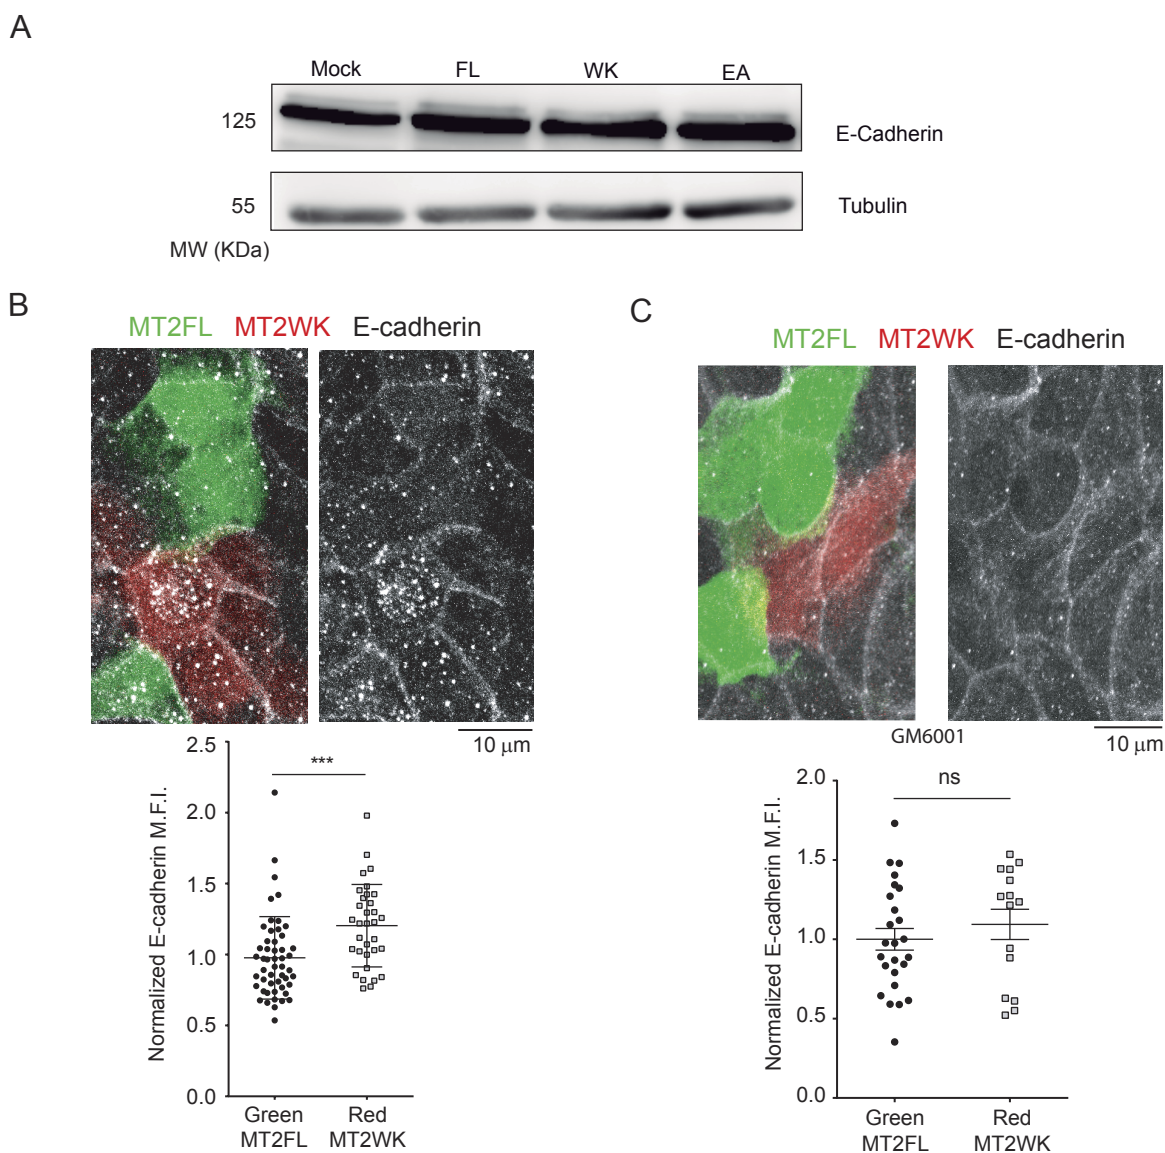

**Figure S3. Impact of MT2-MMP in total and local expression of E-cadherin in MDCK cells.** **A**, Western blot of E-cadherin in cell lysates from MDCK transfectants; tubulin is included as loading control. MW: molecular weight. **B**, Representative maximal projections from confocal images of polarized co-cultures of MT2FL-GFP (green) and MT2WK-mKate2 (red) MDCK cells stained for E-cadherin (white) (top). Bar shows normalized values of E-cadherin average intensity around the junctions. **C**, Same than B in which MDCK cells were treated with the metalloprotease inhibitor GM6001 (50  $\mu$ M). \*\*\*  $p < 0,001$

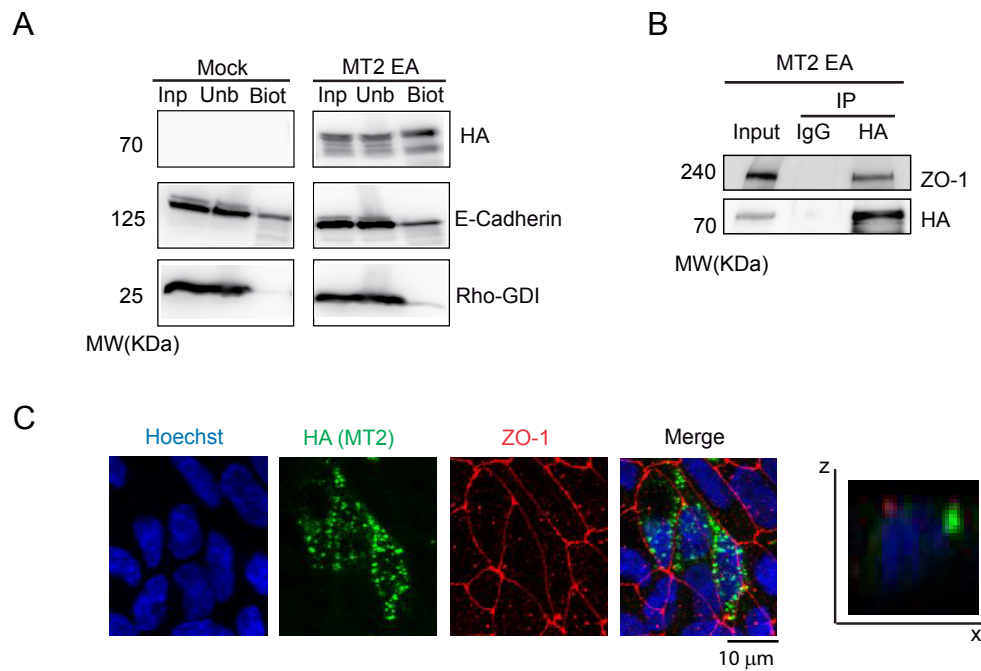

**Figure S4. MT2-MMP catalytic mutant (EA) is expressed at the membrane and interacts with ZO-1.** **A**, Western blot for HA, E-cadherin and Rho-GDI is shown of biotinylated cell lysates from Mock and MT2-MMPEA stable MDCK transfectants pulled-down with streptavidin beads; input, unbound and bound fractions are shown (Inp, Unb, Biot). **B**, Western blot is shown for ZO-1 and HA of cell lysates from MT2-MMPEA stable MDCK transfectants pulled-down with anti-HA antibody; IgG immuno-precipitates and whole lysates (Input) are also shown as controls. Mock and MT2FL corresponding controls are presented in Figure 1B. MW: molecular weight. **C**, Representative maximal projections are shown from apical stacks of confocal sections from polarized MT2EA-MDCK transfectants stained for HA (MT2-MMP, green), ZO-1 (red) and nuclei (Hoechst, blue); orthogonal xz views of 3D confocal image stack is shown to the right. Bar, 10  $\mu$ m.

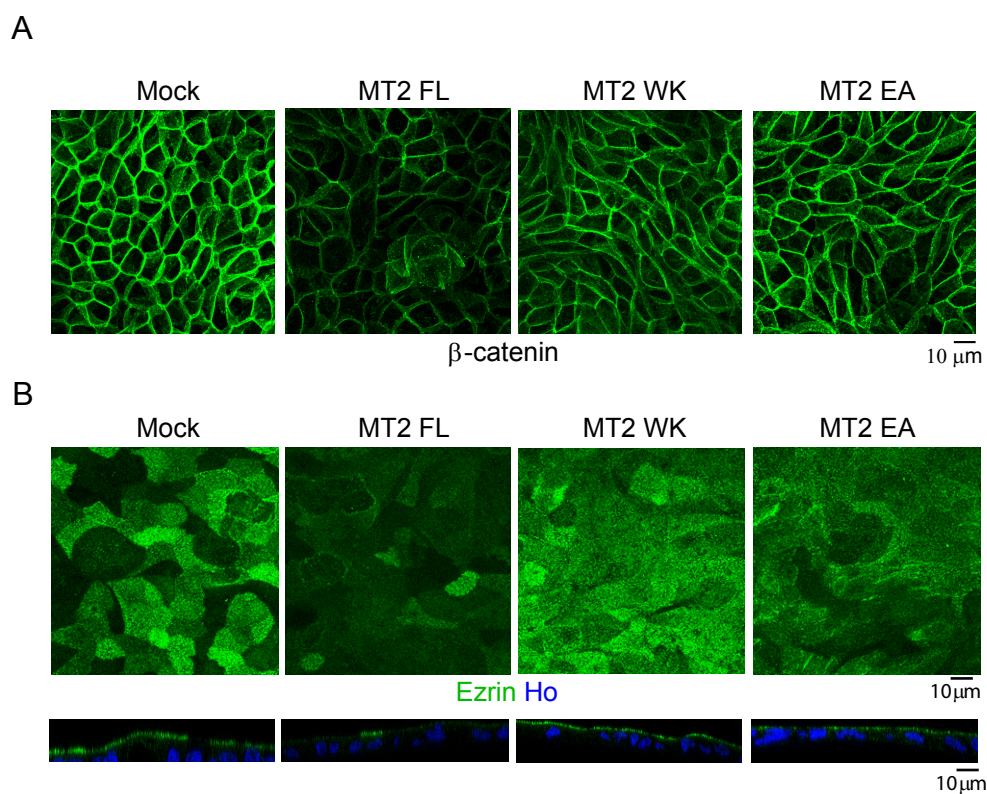

**Figure S5. MT2-MMP disrupts apical E-cadherin-associated proteins and signals.** **A**, Representative maximal projections are shown from confocal sections of polarized MDCK transfectants stained for  $\beta$ -catenin (green). Bar, 10  $\mu$ m. **B**, Representative subapical projections (top) and orthogonal views (bottom) of confocal sections of polarized MDCK transfectants stained for Ezrin (green) and nuclei (Hoechst/Ho, blue). Bar, 10  $\mu$ m.

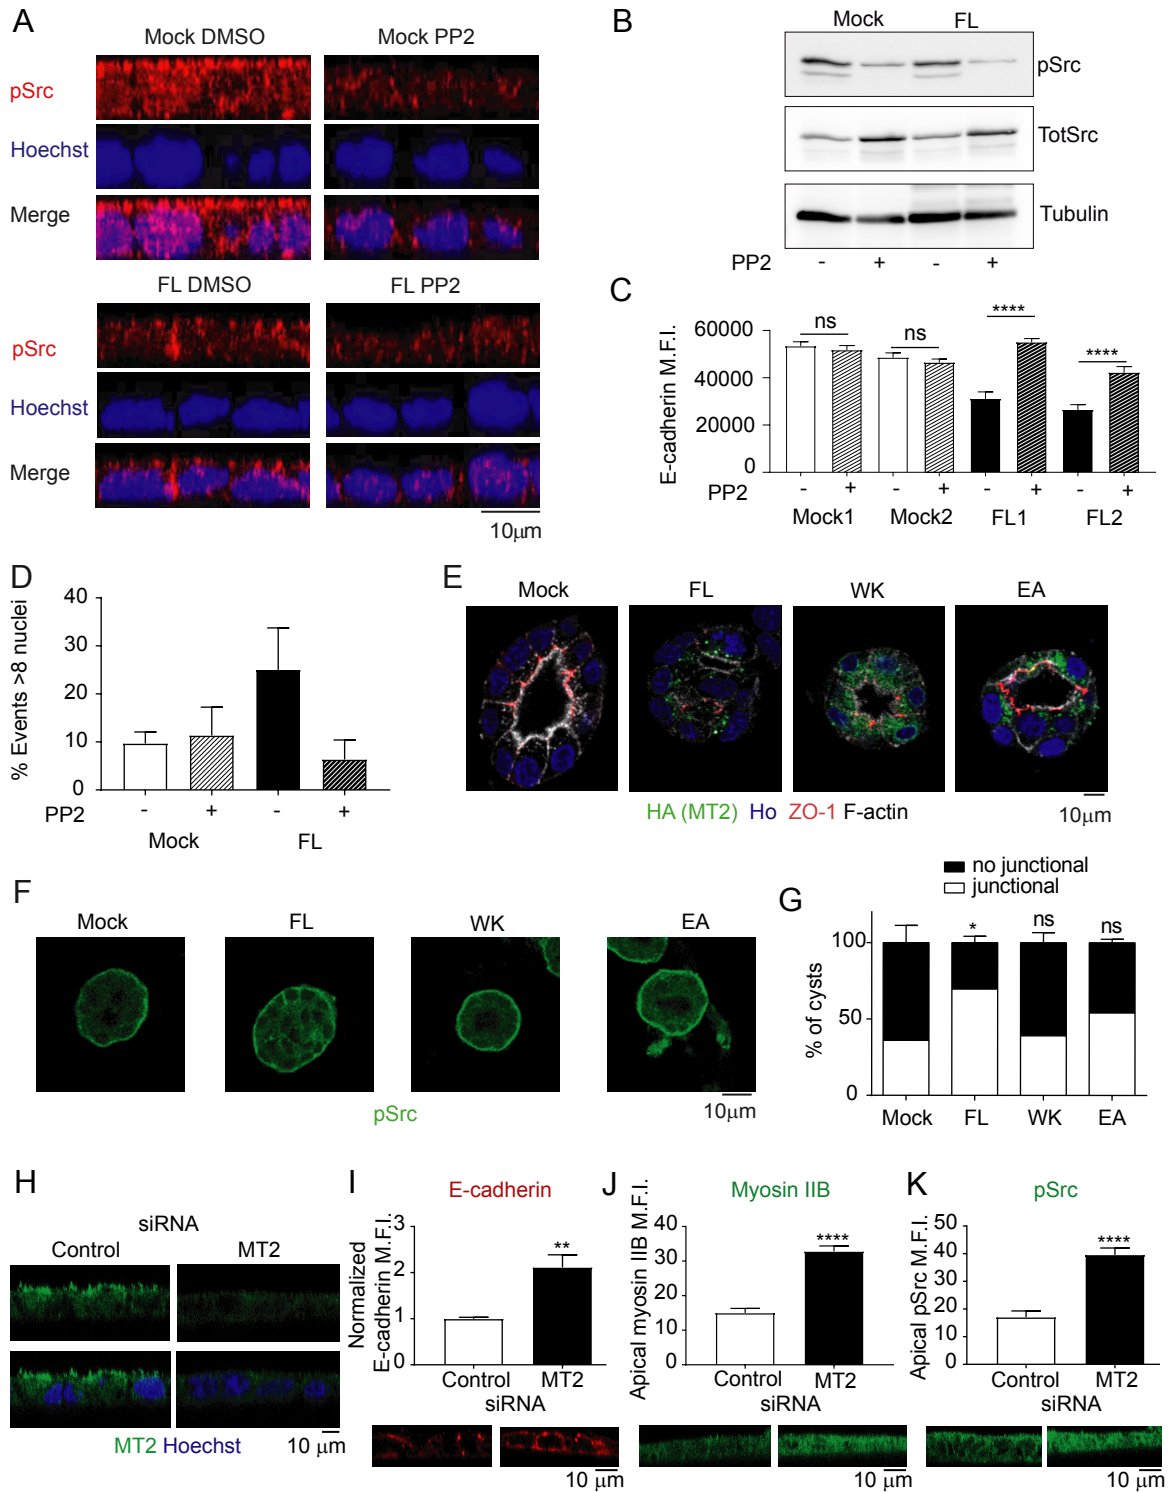

**Figure S6. MT2-MMP expression changes pSrc subcellular location in MDCK cells and in Caco2 cells interfered for MT2-MMP.**

**A**, Representative orthogonal views of polarized MDCKs treated with PP2, and stained with pSrc and Hoechst. **B**, Western Blot analysis of pSrc levels and inhibition by PP2 in MDCK transfectants. **C**, E-cadherin average mean fluorescence intensity (MFI), around the junctions formed by MDCK transfectants treated with PP2 or vehicle (DMSO); n= 4. **D**, Percentages of events with more than 8 cells in mock and MT2 FL MDCK stable transfectants after PP2 or vehicle (DMSO) treatment; n=5. **E**, Representative images of MDCK cysts embedded in matrigel stained with HA (MT2-MMP), Hoechst, ZO-1 and F-actin. **F**, Representative MDCK cysts embedded in matrigel stained with pSrc. **G**, Quantification of the percentage of cysts with a clear junctional pSrc staining. n= 3 independent experiments with more than eighty cyst analysed. **H**, Representative orthogonal images of Caco2 cells interfered for MT2-MMP, showing MT2 staining (green) and Hoechst (blue). **I**, E-Cadherin quantification and representative orthogonal images of Caco2 cells interfered for MT2 (n=15 images). **J**, Myosin IIB quantification and representative orthogonal images of Caco2 cells interfered for MT2 (n= 10 images). **K**, pSrc quantification and representative orthogonal images of Caco2 cells interfered for MT2 (n= 8 images). \* p<0,05; \*\* p<0,01 ; \*\*\* p<0,001; \*\*\*\* p<0,0001.

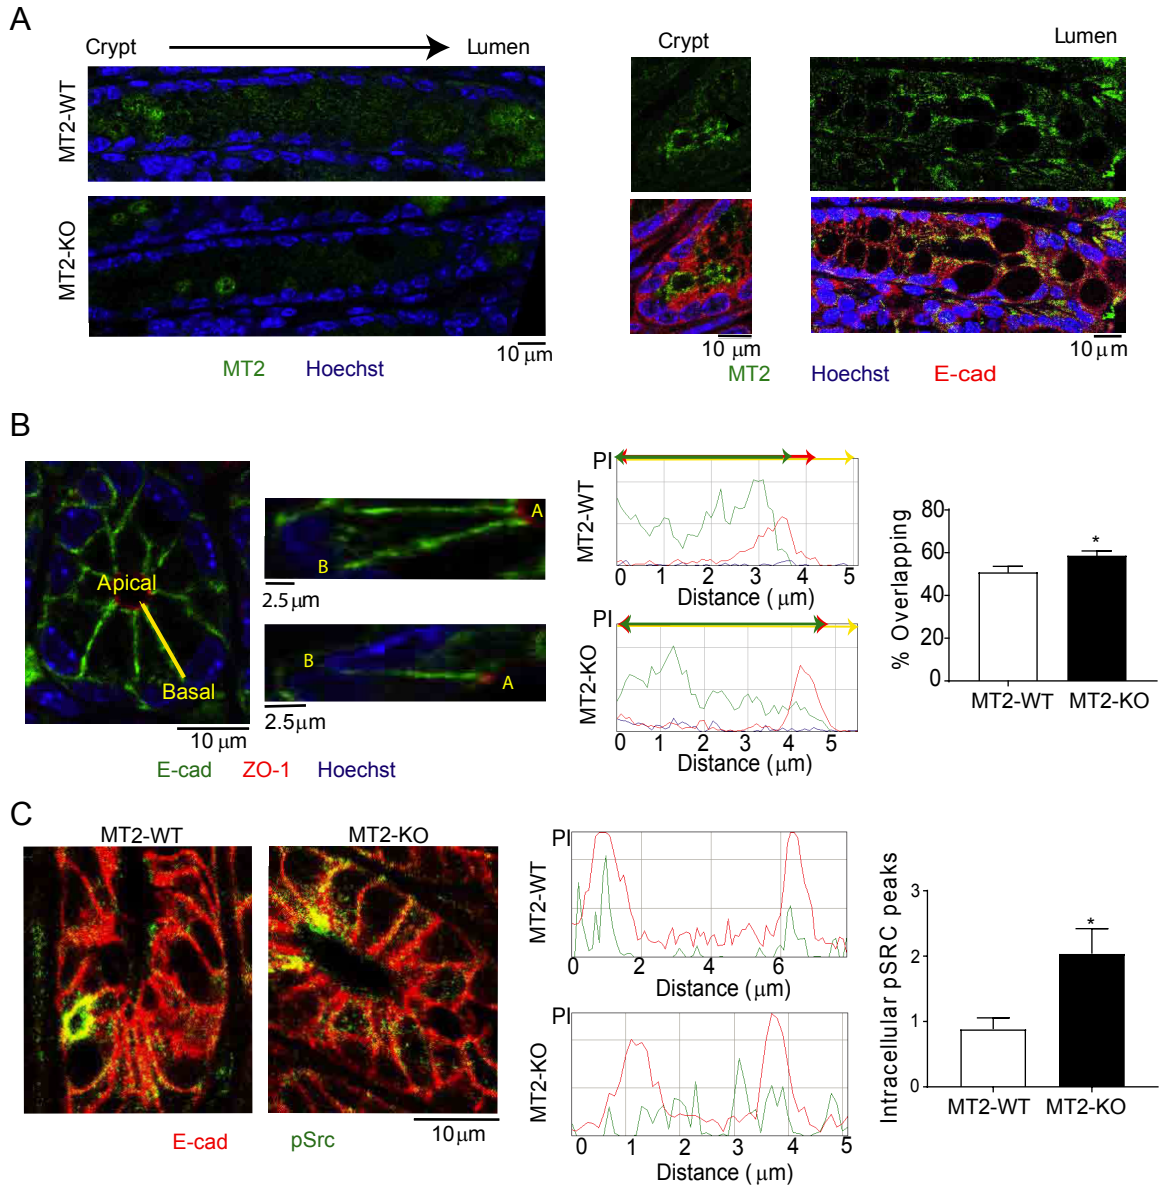



**Figure S7. MT2-MMP deficiency alters mouse colon crypts.** **A**, Representative cropped images from crypts (left) and lumen (right) of colons from wild-type (MT2-WT) and MT2-MMP-null (MT2-KO) mice stained for MT2-MMP (green), E-cadherin (red), and nuclei (Hoechst, blue); note that MT2-MMP seems to be enriched at the apical side of epithelial cells. **B**, A representative image of a colon crypt stained for E-cadherin (green), ZO-1 (red), and nuclei (Hoechst, blue) is shown to the left; the yellow arrow indicates the basal to apical junctional line selected for image analysis. Similar images from wildtype and MT2-MMP-null colons are shown (middle) with the peak intensity profiles for E-cadherin (green) and ZO-1 (red), and the junction in yellow. The bar graph on the right shows the percentage of E-cadherin/ZO-1 overlapping in junctions of epithelial cells in colons from wild-type (MT2-WT) and MT2-MMP-null (MT2-KO) mice. 10 junctions were quantitated per condition in 3 images from 2 mice per genotype. **C**, Representative images of a crypt from wild-type (MT2-WT) and MT2-MMP-null (MT2-KO) colons stained for E-cadherin (red) and pSrc (green) (left). Peak intensity profiles for pSrc (green) and ZO-1 (red) are shown in the middle. The bar graph on the right shows the quantitation of intracellular pSrc peaks per cell. 7 profiles were quantitated per condition with at least 3 cells in the profile, from 2 mice per genotype. \*  $p < 0,05$ .

| P1 position | Residues    | PWM ^ Score | Sec Struct pred | Disorder    | Transmemb domain | N-mass   | C-mass   |
|-------------|-------------|-------------|-----------------|-------------|------------------|----------|----------|
| 20          | PFPKN-LVQIK | 4.93        | ____EEEE        | ..***....   | OOOOOO<br>OOOO   | 2266.06  | 77961.41 |
| 59          | RETGW-LKVTE | 4.92        | ____EEEE_       | .....       | OOOOOO<br>OOOO   | 6608.33  | 73619.14 |
| 93          | EDPME-IVITV | 1.71        | ____EEEEEE      | .....       | OOOOOO<br>OOOO   | 10406.18 | 69821.29 |
| 149         | AIAYS-ILTQD | 2.93        | HHHHHHHHH_      | .....       | OOOOOO<br>OOOO   | 16279.97 | 63947.50 |
| 155         | LTQDP-LLPSS | 1.39        | HHH_____        | .....       | OOOOOO<br>OOOO   | 16947.32 | 63280.15 |
| 160         | LLPSS-MMFTI | 4.11        | _____EE         | .....       | OOOOOO<br>OOOO   | 17444.59 | 62782.88 |
| 188         | VPMYT-LVVQA | 2.23        | ____EEEE        | .....       | OOOOOO<br>OOOO   | 20515.09 | 59712.38 |
| 195         | VQAAD-LQGEG | 5.08        | EEEEHHHHH_      | .....       | OOOOOO<br>OOOO   | 21211.48 | 59015.99 |
| 241         | VEIAV-LKVTD | 2.72        | _HHHHHHHHH      | .....       | OOOOOO<br>OOOO   | 26074.95 | 54152.52 |
| 255         | DTPAW-RAVYT | 1.88        | _____EE         | .....       | OOOOOO<br>OOOO   | 27583.71 | 52643.76 |
| 257         | PAWRA-VYTI  | 2.38        | ____EEEE        | .....       | OOOOOO<br>OOOO   | 27810.85 | 52416.62 |
| 297         | KQQYV-LYVTV | 3.03        | ____HHEEEE      | .....       | OOOOOO<br>OOOO   | 32352.09 | 47875.38 |
| 377         | RDAAG-WLEVN | 1.91        | HHHHHHHHH_      | .....       | OOOOOO<br>OOOO   | 41213.46 | 39014.01 |
| 378         | DAAGW-LEVNP | 4.22        | HHHHHHHHH_      | .....       | OOOOOO<br>OOOO   | 41399.54 | 38827.93 |
| 409         | STYEA-LIIAI | 2.65        | _H_____EE       | .....       | OOOOOO<br>OOOO   | 44947.20 | 35280.27 |
| 445         | PEPRN-MDFCQ | 2.46        | _____           | .....       | OOOOOO<br>OOOO   | 48584.09 | 31643.38 |
| 459         | PHVIN-IIDPD | 3.24        | _____EE         | .....       | OOOOOO<br>OOOO   | 50235.84 | 29991.63 |
| 497         | RESLI-LKPKK | 2.80        | EE_____HH       | .....       | OOOOOO<br>OOOO   | 54410.85 | 25816.62 |
| 512         | DYKIN-LKLTD | 1.63        | ____HH____      | .....       | OOOOOO<br>OOOO   | 56151.82 | 24075.65 |
| 546         | KRTAP-YAEAG | 1.32        | __E_____        | .....       | OOOOOO<br>OOOO   | 59886.62 | 20340.85 |
| 548         | TAPYA-EAGLQ | 1.42        | _E_____         | .....       | OOOOOO<br>OOOO   | 60120.72 | 20106.75 |
| 551         | YAEAG-LQVPA | 4.37        | _____HH         | .....       | OOOOOO<br>OOOM   | 60377.82 | 19849.65 |
| 559         | PAILG-ILGGI | 2.24        | HHHHH_HHH       | .....       | OMMMMM<br>MMMM   | 61169.30 | 19058.17 |
| 563         | GILGG-ILALL | 1.48        | H_HHHHHHH       | .....       | MMMMMM<br>MMMM   | 61509.50 | 18717.97 |
| 566         | GGILA-LLILI | 4.18        | HHHHHHHHHH      | .....       | MMMMMM<br>MMMM   | 61806.70 | 18420.77 |
| 567         | GILAL-LILIL | 2.74        | HHHHHHHHHH      | .....       | MMMMMM<br>MMMM   | 61919.78 | 18307.69 |
| 569         | LALLI-LILL  | 2.52        | HHHHHHHHHH      | .....       | MMMMMM<br>MMMM   | 62145.94 | 18081.53 |
| 676         | PPYDS-LLVFD | 1.41        | HHH_____        | .....       | iiiiiiii         | 74340.98 | 5886.49  |
| 691         | SEAAS-LSSLN | 2.77        | EEEEEE____      | *****<br>** | iiiiiiii         | 75866.66 | 4360.81  |
| 721         | KKLAD-MYGGG | 2.81        | HHHHHH__H       | ....*..**   | iiiiiiii         | 79385.21 | 842.26   |

**Table S1. List of potential cleavage sites for MT2-MMP (MMP15) in E-cadherin.** Predicted sites for human MT2-MMP-mediated cleavage in canine E-cadherin are shown with their cleavage scores (<http://cleavpredict.sanfordburnham.org/>). Candidates were further filtered according to the peptide cleavage matrix in the MEROPS database (<http://merops.sanger.ac.uk/>). The selected cleavage sites in E-cadherin are highlighted in yellow.
